# Supplementary material
Source: PubMed Central journal article supplement (PMC5642328)

**Figure.** Relationship between self-reported (International Physical Activity Questionnaire – Long Form) and accelerometry-based vigorous-intensity physical activity. Dashed lines represent 95% confidence intervals. Diagonal dotted line is the identity line.

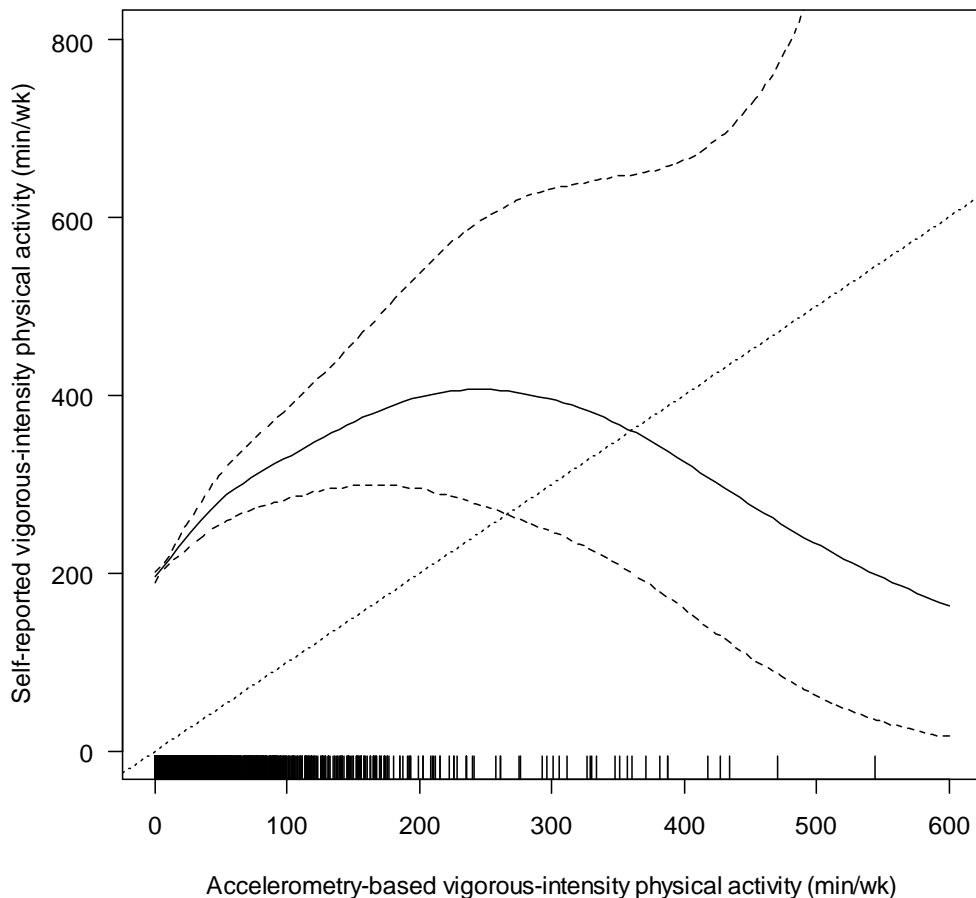

Supplement: mss-48-1075-s003.pdf [file mss-48-1075-s003.pdf]
